# Supplementary material for: A Minimally Invasive Technique for Correcting Extra-Articular Malunions of Metacarpal Fractures
Source: Research Square preprint supplement (doi:10.21203/rs.3.rs-5052323/v1), 2024-10-03
Supplement: Supplementary file 1 [file 7af151726719fc04c8a26664.docx]

| **Table 2. Correction of the malunions after bone healing.** | | |
| --- | --- | --- |
|  | Pre-operation | Immediately after surgery |
| Angulation on X-rays (°) | 46 (12- 66) | 1 (0- 6) |
| Shortening on X-rays (mm) | 5 (2 - 8) | 1 (0 - 3) |
| Rotation (°) * | 9 (0 - 17) | 0 (0 - 4) |
| *, measured using the angle between the middle and ring fingernail during extension. | | |
