# Supplementary material for: A Minimally Invasive Technique for Correcting Extra-Articular Malunions of Metacarpal Fractures
Source: Research Square preprint supplement (doi:10.21203/rs.3.rs-5052323/v1), 2024-10-03
Supplement: Supplementary file 2 [file e8bc2b3920fbbafad717f708.docx]

| **Table 3. Outcomes of 28 patients at the final follow-up.** | | | |
| --- | --- | --- | --- |
|  | Injured side | Opposite side | I/O (%) |
| Active ROM (°, mean, range) |  |  |  |
| MCP joint | 54 (32 - 84) | 78 (68 - 85) | 91 |
| PIP joint | 96 (80 -117) | 104 (94 -118) | 97 |
| DIP joint | 83 (73 - 87) | 81 (73 - 87) | 99 |
| TAM scale (°, mean, range) | 233 (185 - 288) | 263 (235 - 290) | 89 |
| Excellent (100% normal, n) | 8 |  |  |
| Good (75%-99% normal, n) | 19 |  |  |
| Fair (50%-74% normal, n) | 1 |  |  |
| Poor (<50% normal, n) | 0 |  |  |
| Grip strength (kg)* | 41.2 (32.4 - 47.6) | 44.5 (37.1 - 48.9) | 93 |
| Dorsal prominence (VAS, mean, range) | 7 (4 - 9) | 10 (9 - 10) | 70 |
| Pain (cm, mean, range) | 10 (8 - 10) | 10 (9 - 10) |  |
| Satisfaction (SAPS, n) |  |  |  |
| Very satisfied (27–28) | 15 |  |  |
| Satisfied (19–26) | 13 |  |  |
| Dissatisfied (11–18) | 0 |  |  |
| Very dissatisfied (0–10) | 0 |  |  |
| Appearance (VAS, mean, range) | 7 (5 - 8) | 10 (9 - 10) | 70 |
| ROM, range of motion; TAM, total active motion; MCP, metacarpophalangeal; PIP, proximal interphalangeal; | | | |
| DIP, distal interphalangeal; VAS, 10-cm visual analog scale; SAPS, Short Assessment of Patient Satisfaction; | | | |
| I/O, the fractured hand/the opposite healthy hand. | | | |
