# Supplementary material for: A Minimally Invasive Technique for Correcting Extra-Articular Malunions of Metacarpal Fractures
Source: Research Square preprint supplement (doi:10.21203/rs.3.rs-5052323/v1), 2024-10-03
Supplement: Supplementary file 3 [file ec7b0c103ad65a5c1e4199ba.docx]

| **Table 1. Demographic and clinical characteristics for 28 patients.** | |
| --- | --- |
| Age (year) | 32 (21-52) |
| Sex (male : female) | 26 : 2 |
| Side (left : right) | 12 :16 |
| Metacarpals (n ) |  |
| 2th | 1 |
| 3th | 1 |
| 4th | 4 |
| 5th | 25 |
| Dominant hand (n) | 17 : 11 |
| Injury mechanism (n) |  |
| Crushing | 5 |
| Punch | 14 |
| Rotation | 6 |
| Road traffic accident | 3 |
| Duration from injury to surgery (day) | 52 (35 -183) |
| Fracture type (n) |  |
| Transversal | 12 |
| Oblique | 9 |
| Comminuted | 7 |
| Fracture site (n) |  |
| Neck | 21 |
| Shaft | 13 |
| Base | 4 |
| Bone healing (week) | 5.4 (4 - 10) |
| Follow-up time (month) | 27 (24 - 33) |
| Data are expressed as mean and range. | |
